# Supplementary material for: A core phyllosphere microbiome exists across distant populations of a tree species indigenous to New Zealand
Source: PLOS journal article supplement (doi:10.1371/journal.pone.0237079), 2020-08-13
Supplement: S4 (10.1371/journal.pone.0237079.s004) [file journal.pone.0237079.s004]

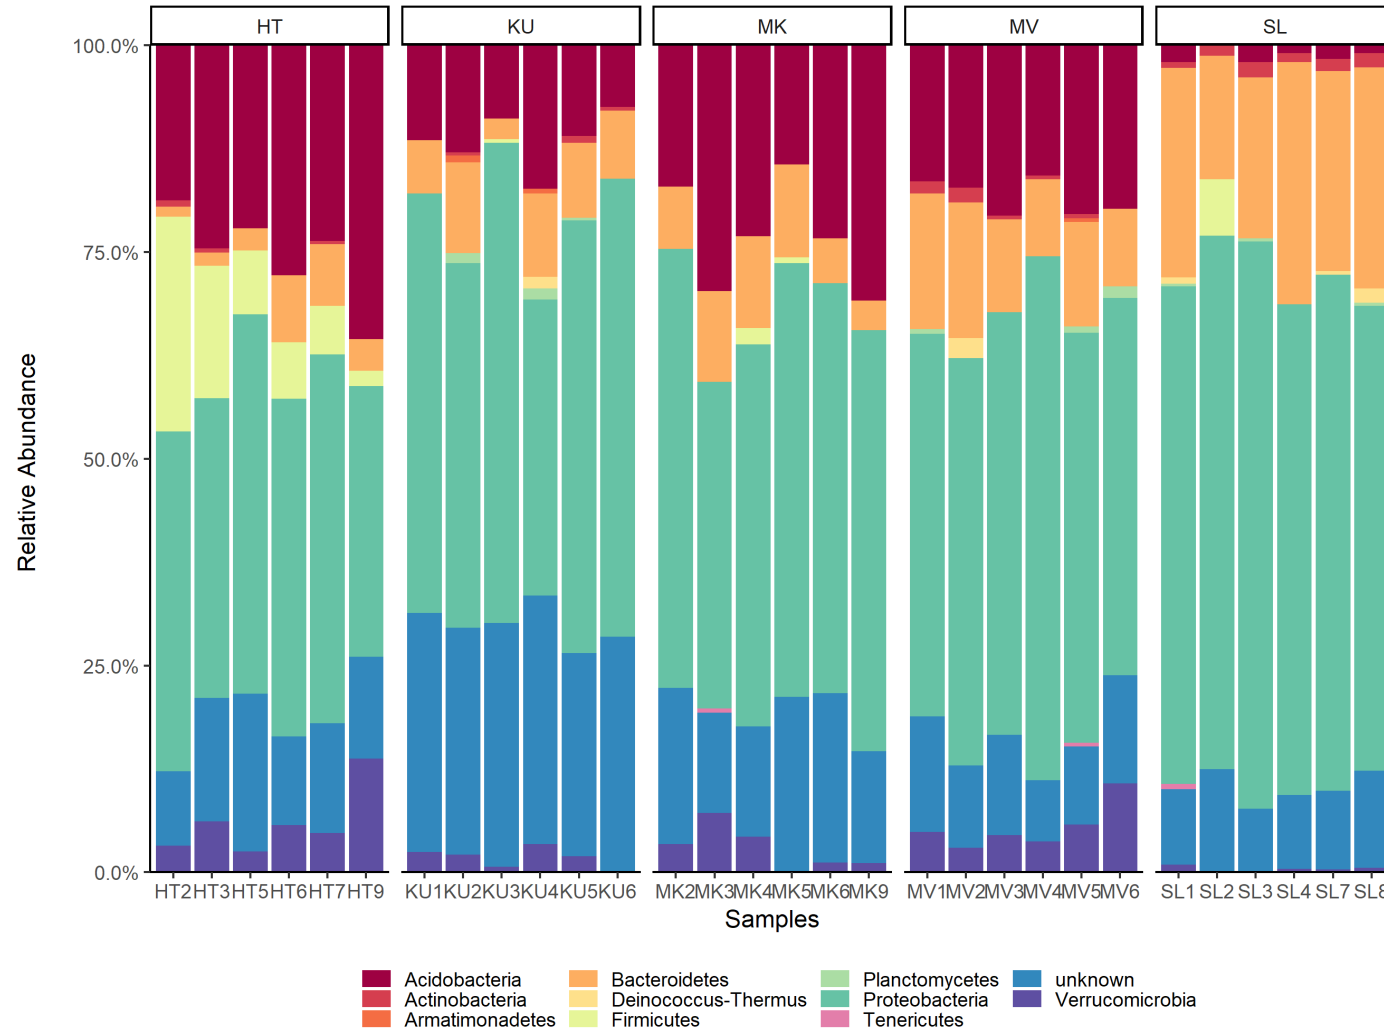

S4 Fig: Average relative abundance of phyla in the phyllosphere microbiome. Bars represent the average relative abundance per sample tree (n=3) and are grouped by site (HT, KU, MK, MV, SL). Phyla are represented by colour.
