# Supplementary material for: A core phyllosphere microbiome exists across distant populations of a tree species indigenous to New Zealand
Source: PLOS journal article supplement (doi:10.1371/journal.pone.0237079), 2020-08-13
Supplement: S11 (10.1371/journal.pone.0237079.s011) [file journal.pone.0237079.s011]

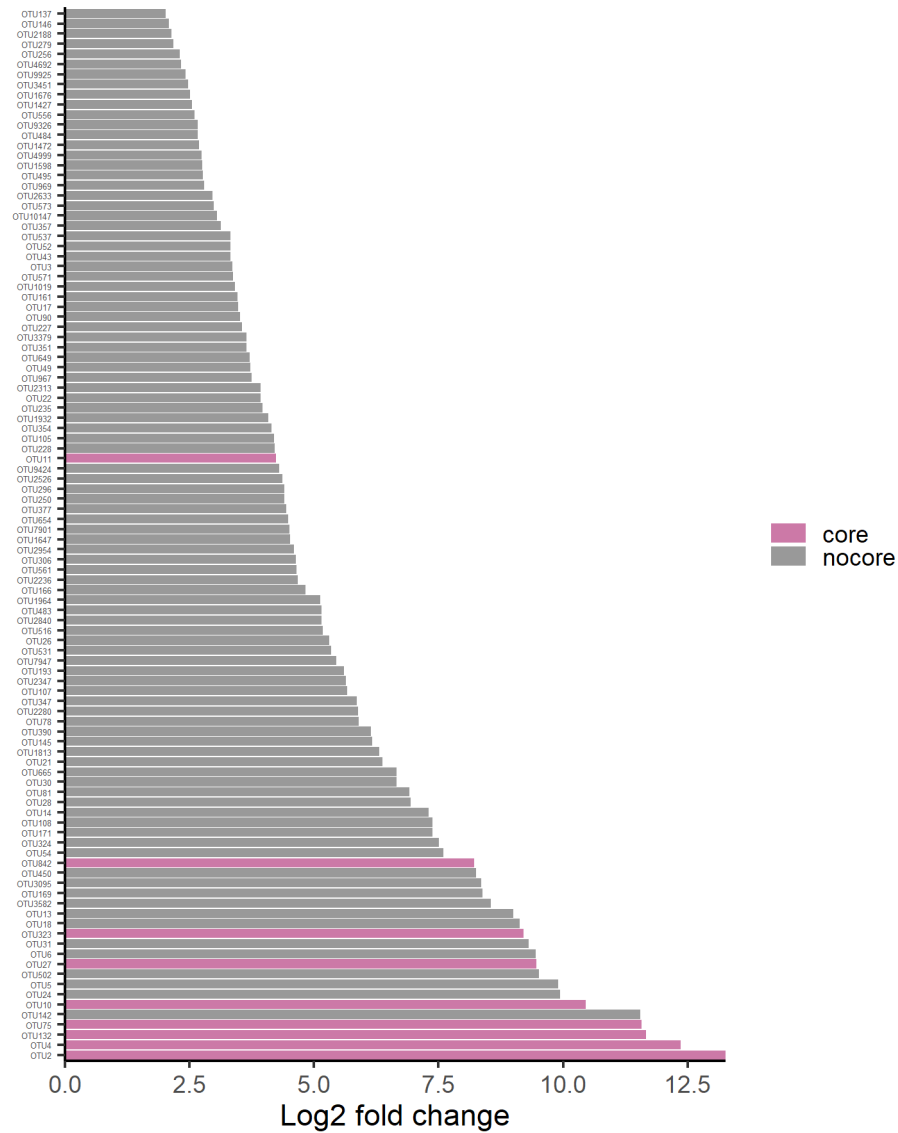

S11 Fig: OTUs with significantly increased abundance in the phyllosphere relative to soil (n=104). Estimates of log2 fold changes were obtained using DESeq2. Colour depicts members of the core phyllosphere microbiome. A full list of OTUs with significant differential abundances, defined by a DeSeq2 log-fold difference with an adjusted p value of  $\leq 0.01$ , is presented in S8 Table.
